# Supplementary material for: GPCR activation mechanisms across classes and macro/microscales
Source: PubMed Central journal article supplement (PMC8580822; doi:10.1038/s41594-021-00674-7), 2021-11-10
Supplement: 41594_2021_674_MOESM1_ESM.pdf [file 41594_2021_674_MOESM1_ESM.pdf]

**Supplementary information**

---

**GPCR activation mechanisms across classes  
and macro/microscales**

---

In the format provided by the  
authors and unedited

1 **Supplementary Table 1 | Representative structures of GPCRs and inactive and active states used as templates.**

2 The structure annotation and criteria-based filtering to select these templates is shown in [Supplementary Spreadsheet 1](#).

| CI | Receptor family                | UniProt | IUPHAR             | Inactive PDB ID | Active PDB ID | Inactive Ref. | Active Ref. |
|----|--------------------------------|---------|--------------------|-----------------|---------------|---------------|-------------|
| A  | Adrenoceptors                  | ADA2B   | $\alpha_{2B}$      |                 | 6K41          |               | 1           |
| A  | Cannabinoid                    | CNR1    | CB <sub>1</sub>    |                 | 6N4B          |               | 2           |
| A  | Chemokine                      | CCR6    | CCR6               |                 | 6WWZ          |               | 3           |
| A  | Formylpeptide                  | FPR2    | FPR2/ALX           |                 | 6OMM          |               | 4           |
| A  | Neurotensin                    | NTR1    | NTS1               |                 | 6OS9          |               | 5           |
| A  | Adrenoceptors                  | ADRB2   | $\beta_2$          | 2RH1            | 3SN6          | 6             | 7           |
| A  | Dopamine                       | DRD3    | D <sub>3</sub>     | 3PBL            |               | 8             |             |
| A  | Histamine                      | HRH1    | H <sub>1</sub>     | 3RZE            |               | 9             |             |
| A  | Lysophospholipid (S1P)         | S1PR1   | S1P <sub>1</sub>   | 3V2Y            |               | 10            |             |
| A  | Opioid                         | OPRK    | $\kappa$           | 4DJH            |               | 11            |             |
| A  | Opioid                         | OPRM    | $\mu$              | 4DKL            | 6DDE          | 12            | 13          |
| A  | Opioid                         | OPRD    | $\delta$           | 4N6H            |               | 14            |             |
| A  | Acetylcholine (muscarinic)     | ACM3    | M <sub>3</sub>     | 4U15            |               | 15            |             |
| A  | Lysophospholipid (LPA)         | LPAR1   | LPA <sub>1</sub>   | 4Z36            |               | 16            |             |
| A  | Angiotensin                    | AGTR1   | AT <sub>1</sub>    | 4ZUD            |               | 17            |             |
| A  | Acetylcholine (muscarinic)     | ACM1    | M <sub>1</sub>     | 5CXV            | 6OIJ          | 18            | 19          |
| A  | Opioid                         | OPRX    | NOP                | 5DHH            |               | 20            |             |
| A  | Acetylcholine (muscarinic)     | ACM4    | M <sub>4</sub>     | 5DSG            |               | 18            |             |
| A  | Adenosine                      | AA2AR   | A <sub>2A</sub>    | 5NM4            | 5G53          | 21            | 22          |
| A  | Adenosine                      | AA1R    | A <sub>1</sub>     | 5UEN            | 6D9H          | 23            | 24          |
| A  | Dopamine                       | DRD4    | D <sub>4</sub>     | 5WIU            |               | 25            |             |
| A  | Orexin                         | OX2R    | OX <sub>2</sub>    | 5WQC            |               | 26            |             |
| A  | Endothelin                     | EDNRB   | ETB                | 5X93            |               | 27            |             |
| A  | Neuropeptide Y                 | NPY1R   | Y <sub>1</sub>     | 5ZBQ            |               | 28            |             |
| A  | Acetylcholine (muscarinic)     | ACM2    | M <sub>2</sub>     | 5ZKC            | 6OIK          | 29            | 19          |
| A  | Cannabinoid                    | CNR2    | CB <sub>2</sub>    | 5ZTY            | 6KPF          | 30            | 31          |
| A  | 5-Hydroxytryptamine            | 5HT2A   | 5-HT <sub>2A</sub> | 6A94            |               | 32            |             |
| A  | 5-Hydroxytryptamine            | 5HT2C   | 5-HT <sub>2C</sub> | 6BQH            |               | 33            |             |
| A  | Complement peptide             | C5AR1   | C5a <sub>1</sub>   | 6C1R            |               | 34            |             |
| A  | Dopamine                       | DRD2    | D <sub>2</sub>     | 6CM4            |               | 35            |             |
| A  | Tachykinin                     | NK1R    | NK <sub>1</sub>    | 6HLP            |               | 36            |             |
| A  | Ghrelin                        | GHSR    | Ghrelin            | 6KO5            |               | 37            |             |
| A  | Adrenoceptors                  | ADA2C   | $\alpha_{2C}$      | 6KUW            |               | 38            |             |
| A  | Chemokine                      | CXCR2   | CXCR2              | 6LFL            | 6LFO          | 39            | 39          |
| A  | Acetylcholine (muscarinic)     | ACM5    | M <sub>5</sub>     | 6OL9            |               | 40            |             |
| A  | Melatonin                      | MTR1A   | MT <sub>1</sub>    | 6PS8            |               | 41            |             |
| A  | Orexin                         | OX1R    | OX <sub>1</sub>    | 6TOD            |               | 42            |             |
| A  | Vasopressin and oxytocin       | OXYR    | OT                 | 6TPK            |               | 43            |             |
| B1 | Calcitonin                     | CALCR   | CT                 |                 | 6NIY          |               | 44          |
| B1 | Calcitonin                     | CALRL   | Calcitonin-like    |                 | 6UVA          |               | 45          |
| B1 | Corticotropin-releasing factor | CRFR2   | CRF2               |                 | 6PB1          |               | 46          |
| B1 | Glucagon                       | SCTR    | Secretin           |                 | 6WZG          |               | 47          |
| B1 | VIP and PACAP                  | PACR    | PAC1               |                 | 6M1I          |               | 48          |
| B1 | VIP and PACAP                  | VIPR1   | VPAC1              |                 | 6VN7          |               | 49          |
| B1 | Corticotropin-releasing factor | CRFR1   | CRF1               | 4K5Y            | 6P9X          | 46            | 50          |
| B1 | Glucagon                       | GLR     | Glucagon           | 5EE7            | 6WPW          | 51            | 52          |
| B1 | Parathyroid hormone            | PTH1R   | PTH1               |                 | 6NBH          |               | 53          |
| B1 | Glucagon                       | GLP1R   | GLP-1              | 6LN2            | 6X18          | 54            | 55          |
| C  | Metabotropic glutamate         | GRM1    | mGlu <sub>1</sub>  | 4OR2            |               | 56            |             |
| C  | Metabotropic glutamate         | GRM2    | mGlu <sub>2</sub>  |                 | 7E9G          |               | 57          |
| C  | Metabotropic glutamate         | GRM5    | mGlu <sub>5</sub>  | 6FFI            |               | 58            |             |
| C  | GABAB                          | GABR1   | GABA <sub>B1</sub> | 7C7S            |               | 59            |             |
| C  | GABAB                          | GABR2   | GABA <sub>B2</sub> | 7C7S            | 7C7Q          | 59            | 59          |
| F  | Frizzled                       | SMO     | SMO                | 4JKV            | 6XBK          | 60            | 61          |
| F  | Frizzled                       | FZD4    | FZD <sub>4</sub>   | 6BD4            |               | 62            |             |
| F  | Frizzled                       | FZD7    | FZD <sub>7</sub>   | 7EVW            |               |               | 63          |

1 **Supplementary Table 2 | State-changing residue mutation potency and Emax values.** Individual data points for the  
 2 potency reduction and Emax values plotted and visualised in [Figure 5](#).

| Generic residue number | State contact difference | Gs pEC50 reduction (log units) | G15 pEC50 reduction (log units) | Gs Emax (%) | G15 Emax (%) |
|------------------------|--------------------------|--------------------------------|---------------------------------|-------------|--------------|
| 7x50                   | 151                      | 1.2                            | 1.5                             | 83          | 75           |
| 5x58                   | 92                       | 2.0                            | 1.7                             | 93          | 17           |
| 23x52                  | 90                       | 0.5                            | 1.1                             | 50          | 58           |
| 7x46                   | 86                       | 0.8                            | 1.1                             | 107         | 90           |
| 2x42                   | 84                       | 1.1                            | 1.2                             | 60          | 77           |
| 3x41                   | 81                       | 0.8                            | 0.9                             | 117         | 101          |
| 1x51                   | 1                        | -0.2                           | 0.1                             | 99          | 99           |
| 3x42                   | 1                        | 0.0                            | 0.2                             | 47          | 39           |
| 4x51                   | 1                        | 0.4                            | 0.4                             | 85          | 91           |
| 4x52                   | 1                        | 0.7                            | 0.6                             | 76          | 93           |
| 6x61                   | 1                        | -0.4                           | -0.1                            | 102         | 98           |
| 3x51                   | 0                        | 0.8                            | 0.3                             | 73          | 87           |

3  
4

## 5 **References**

- 6 1 Yuan, D. *et al.* Activation of the alpha2B adrenoceptor by the sedative sympatholytic dexmedetomidine. *Nat. Chem. Biol.* **16**, 507-512, doi:10.1038/s41589-020-0492-2 (2020).
- 7
- 8 2 Krishna Kumar, K. *et al.* Structure of a Signaling Cannabinoid Receptor 1-G Protein Complex. *Cell* **176**, 448-458 e412, doi:10.1016/j.cell.2018.11.040 (2019).
- 9
- 10 3 Wasilko, D. J. *et al.* Structural basis for chemokine receptor CCR6 activation by the endogenous protein ligand CCL20. *Nat Commun* **11**, 3031, doi:10.1038/s41467-020-16820-6 (2020).
- 11
- 12 4 Zhuang, Y. *et al.* Structure of formylpeptide receptor 2-Gi complex reveals insights into ligand recognition and signaling. *Nat Commun* **11**, 885, doi:10.1038/s41467-020-14728-9 (2020).
- 13
- 14 5 Kato, H. E. *et al.* Conformational transitions of a neurotensin receptor 1-Gi1 complex. *Nature* **572**, 80-85, doi:10.1038/s41586-019-1337-6 (2019).
- 15
- 16 6 Cherezov, V. *et al.* High-resolution crystal structure of an engineered human beta2-adrenergic G protein-coupled receptor. *Science* **318**, 1258-1265, doi:10.1126/science.1150577 (2007).
- 17
- 18 7 Rasmussen, S. G. *et al.* Crystal structure of the beta2 adrenergic receptor-Gs protein complex. *Nature* **477**, 549-555, doi:10.1038/nature10361 (2011).
- 19
- 20 8 Chien, E. Y. *et al.* Structure of the human dopamine D3 receptor in complex with a D2/D3 selective antagonist. *Science* **330**, 1091-1095, doi:10.1126/science.1197410 (2010).
- 21

1 9 Shimamura, T. *et al.* Structure of the human histamine H1 receptor complex with doxepin. *Nature* **475**, 65-70,  
2 doi:10.1038/nature10236 (2011).

3 10 Hanson, M. A. *et al.* Crystal structure of a lipid G protein-coupled receptor. *Science* **335**, 851-855,  
4 doi:10.1126/science.1215904 (2012).

5 11 Wu, H. *et al.* Structure of the human kappa-opioid receptor in complex with JD1c. *Nature* **485**, 327-332,  
6 doi:10.1038/nature10939 (2012).

7 12 Manglik, A. *et al.* Crystal structure of the micro-opioid receptor bound to a morphinan antagonist. *Nature* **485**,  
8 321-326, doi:10.1038/nature10954 (2012).

9 13 Koehl, A. *et al.* Structure of the micro-opioid receptor-Gi protein complex. *Nature* **558**, 547-552,  
10 doi:10.1038/s41586-018-0219-7 (2018).

11 14 Fenalti, G. *et al.* Molecular control of delta-opioid receptor signalling. *Nature* **506**, 191-196,  
12 doi:10.1038/nature12944 (2014).

13 15 Thorsen, T. S., Matt, R., Weis, W. I. & Kobilka, B. K. Modified T4 Lysozyme Fusion Proteins Facilitate G  
14 Protein-Coupled Receptor Crystallography. *Structure* **22**, 1657-1664, doi:10.1016/j.str.2014.08.022 (2014).

15 16 Chrencik, J. E. *et al.* Crystal Structure of Antagonist Bound Human Lysophosphatidic Acid Receptor 1. *Cell*  
16 **161**, 1633-1643, doi:10.1016/j.cell.2015.06.002 (2015).

17 17 Zhang, H. *et al.* Structural Basis for Ligand Recognition and Functional Selectivity at Angiotensin Receptor.  
18 *The Journal of biological chemistry* **290**, 29127-29139, doi:10.1074/jbc.M115.689000 (2015).

19 18 Thal, D. M. *et al.* Crystal structures of the M1 and M4 muscarinic acetylcholine receptors. *Nature* **531**, 335-340,  
20 doi:10.1038/nature17188 (2016).

21 19 Maeda, S., Qu, Q., Robertson, M. J., Skiniotis, G. & Kobilka, B. K. Structures of the M1 and M2 muscarinic  
22 acetylcholine receptor/G-protein complexes. *Science* **364**, 552-557, doi:10.1126/science.aaw5188 (2019).

23 20 Miller, R. L. *et al.* The Importance of Ligand-Receptor Conformational Pairs in Stabilization: Spotlight on the  
24 N/OFQ G Protein-Coupled Receptor. *Structure* **23**, 2291-2299, doi:10.1016/j.str.2015.07.024 (2015).

25 21 Weinert, T. *et al.* Serial millisecond crystallography for routine room-temperature structure determination at  
26 synchrotrons. *Nat Commun* **8**, 542, doi:10.1038/s41467-017-00630-4 (2017).

27 22 Carpenter, B., Nehme, R., Warne, T., Leslie, A. G. & Tate, C. G. Structure of the adenosine A(2A) receptor  
28 bound to an engineered G protein. *Nature* **536**, 104-107, doi:10.1038/nature18966 (2016).

1 23 Glukhova, A. *et al.* Structure of the Adenosine A1 Receptor Reveals the Basis for Subtype Selectivity. *Cell* **168**,  
2 867-877 e813, doi:10.1016/j.cell.2017.01.042 (2017).

3 24 Draper-Joyce, C. J. *et al.* Structure of the adenosine-bound human adenosine A1 receptor-Gi complex. *Nature*  
4 **558**, 559-563, doi:10.1038/s41586-018-0236-6 (2018).

5 25 Wang, S. *et al.* D4 dopamine receptor high-resolution structures enable the discovery of selective agonists.  
6 *Science* **358**, 381-386, doi:10.1126/science.aan5468 (2017).

7 26 Suno, R. *et al.* Crystal Structures of Human Orexin 2 Receptor Bound to the Subtype-Selective Antagonist  
8 EMPA. *Structure* **26**, 7-19 e15, doi:10.1016/j.str.2017.11.005 (2018).

9 27 Shihoya, W. *et al.* X-ray structures of endothelin ETB receptor bound to clinical antagonist bosentan and its  
10 analog. *Nat. Struct. Mol. Biol.* **24**, 758-764, doi:10.1038/nsmb.3450 (2017).

11 28 Yang, Z. *et al.* Structural basis of ligand binding modes at the neuropeptide Y Y1 receptor. *Nature* **556**, 520-  
12 524, doi:10.1038/s41586-018-0046-x (2018).

13 29 Suno, R. *et al.* Structural insights into the subtype-selective antagonist binding to the M2 muscarinic receptor.  
14 *Nat. Chem. Biol.* **14**, 1150-1158, doi:10.1038/s41589-018-0152-y (2018).

15 30 Li, X. *et al.* Crystal Structure of the Human Cannabinoid Receptor CB2. *Cell* **176**, 459-467 e413,  
16 doi:10.1016/j.cell.2018.12.011 (2019).

17 31 Hua, T. *et al.* Activation and Signaling Mechanism Revealed by Cannabinoid Receptor-Gi Complex Structures.  
18 *Cell* **180**, 655-665 e618, doi:10.1016/j.cell.2020.01.008 (2020).

19 32 Kimura, K. T. *et al.* Structures of the 5-HT2A receptor in complex with the antipsychotics risperidone and  
20 zotepine. *Nat. Struct. Mol. Biol.* **26**, 121-128, doi:10.1038/s41594-018-0180-z (2019).

21 33 Peng, Y. *et al.* 5-HT2C Receptor Structures Reveal the Structural Basis of GPCR Polypharmacology. *Cell* **172**,  
22 719-730 e714, doi:10.1016/j.cell.2018.01.001 (2018).

23 34 Liu, H. *et al.* Orthosteric and allosteric action of the C5a receptor antagonists. *Nat. Struct. Mol. Biol.* **25**, 472-  
24 481, doi:10.1038/s41594-018-0067-z (2018).

25 35 Wang, S. *et al.* Structure of the D2 dopamine receptor bound to the atypical antipsychotic drug risperidone.  
26 *Nature* **555**, 269-273, doi:10.1038/nature25758 (2018).

27 36 Schoppe, J. *et al.* Crystal structures of the human neurokinin 1 receptor in complex with clinically used  
28 antagonists. *Nat Commun* **10**, 17, doi:10.1038/s41467-018-07939-8 (2019).

1 37 Shiimura, Y. *et al.* Structure of an antagonist-bound ghrelin receptor reveals possible ghrelin recognition mode.  
2 *Nat Commun* **11**, 4160, doi:10.1038/s41467-020-17554-1 (2020).

3 38 Chen, X. *et al.* Molecular Mechanism for Ligand Recognition and Subtype Selectivity of alpha2C Adrenergic  
4 Receptor. *Cell reports* **29**, 2936-2943 e2934, doi:10.1016/j.celrep.2019.10.112 (2019).

5 39 Liu, K. *et al.* Structural basis of CXC chemokine receptor 2 activation and signalling. *Nature* **585**, 135-140,  
6 doi:10.1038/s41586-020-2492-5 (2020).

7 40 Vuckovic, Z. *et al.* Crystal structure of the M5 muscarinic acetylcholine receptor. *Proceedings of the National  
8 Academy of Sciences of the United States of America* **116**, 26001-26007, doi:10.1073/pnas.1914446116 (2019).

9 41 Ishchenko, A. *et al.* Toward G protein-coupled receptor structure-based drug design using X-ray lasers. *IUCrJ*  
10 **6**, 1106-1119, doi:10.1107/S2052252519013137 (2019).

11 42 Rappas, M. *et al.* Comparison of Orexin 1 and Orexin 2 Ligand Binding Modes Using X-ray Crystallography  
12 and Computational Analysis. *Journal of medicinal chemistry* **63**, 1528-1543,  
13 doi:10.1021/acs.jmedchem.9b01787 (2020).

14 43 Waltenspuhl, Y., Schoppe, J., Ehrenmann, J., Kummer, L. & Pluckthun, A. Crystal structure of the human  
15 oxytocin receptor. *Sci Adv* **6**, eabb5419, doi:10.1126/sciadv.abb5419 (2020).

16 44 Dal Maso, E. *et al.* The Molecular Control of Calcitonin Receptor Signaling. *ACS Pharmacol Transl Sci* **2**, 31-  
17 51, doi:10.1021/acsptsci.8b00056 (2019).

18 45 Liang, Y. L. *et al.* Structure and Dynamics of Adrenomedullin Receptors AM1 and AM2 Reveal Key  
19 Mechanisms in the Control of Receptor Phenotype by Receptor Activity-Modifying Proteins. *ACS Pharmacol  
20 Transl Sci* **3**, 263-284, doi:10.1021/acsptsci.9b00080 (2020).

21 46 Hollenstein, K. *et al.* Structure of class B GPCR corticotropin-releasing factor receptor 1. *Nature* **499**, 438-443,  
22 doi:10.1038/nature12357 (2013).

23 47 Dong, M. *et al.* Structure and dynamics of the active Gs-coupled human secretin receptor. *Nat Commun* **11**,  
24 4137, doi:10.1038/s41467-020-17791-4 (2020).

25 48 Wang, J. *et al.* Cryo-EM structures of PAC1 receptor reveal ligand binding mechanism. *Cell Res.* **30**, 436-445,  
26 doi:10.1038/s41422-020-0280-2 (2020).

27 49 Duan, J. *et al.* Cryo-EM structure of an activated VIP1 receptor-G protein complex revealed by a NanoBiT  
28 tethering strategy. *Nat Commun* **11**, 4121, doi:10.1038/s41467-020-17933-8 (2020).

1 50 Liang, Y. L. *et al.* Toward a Structural Understanding of Class B GPCR Peptide Binding and Activation. *Mol.*  
2 *Cell* **77**, 656-668 e655, doi:10.1016/j.molcel.2020.01.012 (2020).

3 51 Jazayeri, A. *et al.* Extra-helical binding site of a glucagon receptor antagonist. *Nature* **533**, 274-277,  
4 doi:10.1038/nature17414 (2016).

5 52 Hilger, D. *et al.* Structural insights into differences in G protein activation by family A and family B GPCRs.  
6 *Science* **369**, eaba3373, doi:10.1126/science.aba3373 (2020).

7 53 Zhao, L. H. *et al.* Structure and dynamics of the active human parathyroid hormone receptor-1. *Science* **364**,  
8 148-153, doi:10.1126/science.aav7942 (2019).

9 54 Wu, F. *et al.* Full-length human GLP-1 receptor structure without orthosteric ligands. *Nat Commun* **11**, 1272,  
10 doi:10.1038/s41467-020-14934-5 (2020).

11 55 Zhang, X. *et al.* Differential GLP-1R Binding and Activation by Peptide and Non-peptide Agonists. *Mol. Cell*  
12 **80**, 485-500 e487, doi:10.1016/j.molcel.2020.09.020 (2020).

13 56 Wu, H. *et al.* Structure of a class C GPCR metabotropic glutamate receptor 1 bound to an allosteric modulator.  
14 *Science* **344**, 58-64, doi:10.1126/science.1249489 (2014).

15 57 Lin, S. *et al.* Structures of G(i)-bound metabotropic glutamate receptors mGlu2 and mGlu4. *Nature* **594**, 583-  
16 588, doi:10.1038/s41586-021-03495-2 (2021).

17 58 Christopher, J. A. *et al.* Structure-Based Optimization Strategies for G Protein-Coupled Receptor (GPCR)  
18 Allosteric Modulators: A Case Study from Analyses of New Metabotropic Glutamate Receptor 5 (mGlu5) X-  
19 ray Structures. *Journal of medicinal chemistry* **62**, 207-222, doi:10.1021/acs.jmedchem.7b01722 (2019).

20 59 Mao, C. *et al.* Cryo-EM structures of inactive and active GABAB receptor. *Cell Res.* **30**, 564-573,  
21 doi:10.1038/s41422-020-0350-5 (2020).

22 60 Wang, C. *et al.* Structure of the human smoothed receptor bound to an antitumour agent. *Nature* **497**, 338-  
23 343, doi:10.1038/nature12167 (2013).

24 61 Qi, X., Friedberg, L., De Bose-Boyd, R., Long, T. & Li, X. Sterols in an intramolecular channel of Smoothened  
25 mediate Hedgehog signaling. *Nat. Chem. Biol.* **16**, 1368-1375, doi:10.1038/s41589-020-0646-2 (2020).

26 62 Yang, S. *et al.* Crystal structure of the Frizzled 4 receptor in a ligand-free state. *Nature* **560**, 666-670,  
27 doi:10.1038/s41586-018-0447-x (2018).

28 63 . doi:10.1038/s41422-021-00525-6 (  
29
